# Supplementary material for: Facile fabrication of a high performance TiNb2O7 anode for large-scale electrical energy storage
Source: Royal Society of Chemistry journal article supplement (doi:10.1039/d2ta03995h), 2022-01-01
Supplement: d2ta03995h1.pdf [file d2ta03995h1.pdf]

## Supporting Information

### **Facile fabrication of high performance $\text{TiNb}_2\text{O}_7$ anode for large-scale electrical energy storage**

Li-Qian Cheng,<sup>a</sup> Yijuan He,<sup>a</sup> Kai Chen,<sup>\*b</sup> Zhenhua Ma,<sup>a</sup> Ruiping Liu,<sup>a</sup> Na Liu<sup>b</sup> and Yichen Deng<sup>b</sup>

<sup>a</sup> *Department of Materials Science and Engineering, China University of Mining & Technology, Beijing, 100083, Beijing, China*

<sup>b</sup> *QingTao (Kunshan) Energy Development Co., Ltd., 215334, Suzhou, China*

*E-mail: chen\_kai\_qingtao@163.com*

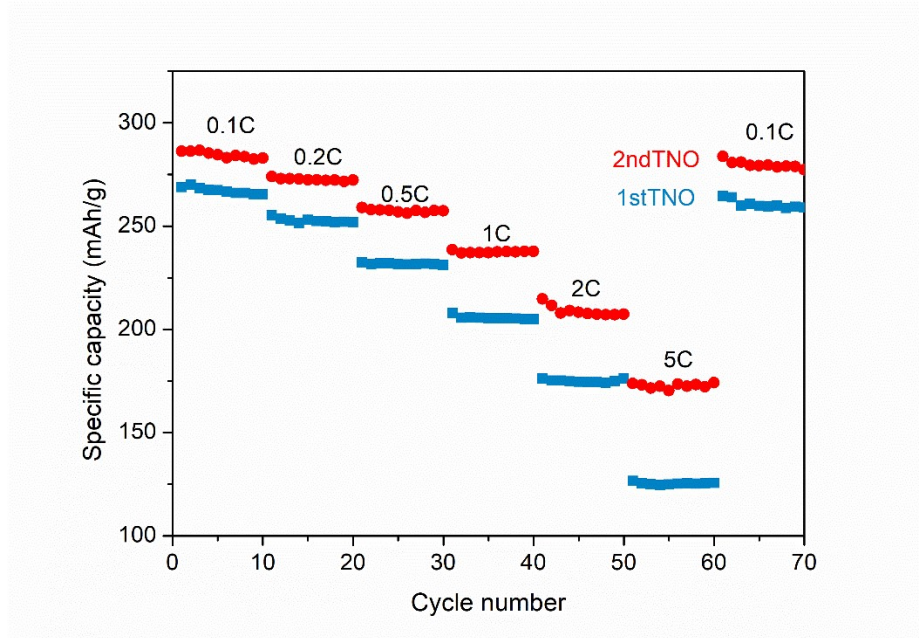

Figure S1 Capacity retention of 1stTNO and 2ndTNO anodes at different rates.

#### Equation (S1)

$$I_p = 0.4463nFA_s cv^{1/2} \sqrt{\frac{nFD}{RT}} \quad (\text{S1})$$

where  $I_p$  is the peak current in CV curves,  $R$  is the gas constant,  $T$  is the absolute temperature,  $F$  is the Faraday constant,  $n$  is the number of electrons transferred per molecule,  $c$  is the molar concentration of lithium ions in the solid,  $v$  is the scan speed, and  $A_s$  is the surface area of the electrode, which can be obtained from the product of  $A$  (the active surface area of the electrode),  $m$  (mass loading), and  $S$  (the surface area of TNO per unit weight).

Table S1 The  $\text{Li}^+$  diffusion coefficients of 1stTNO and 2ndTNO powders.

| Sample | $D_{\text{lithiation}} (\text{cm}^2 \cdot \text{s}^{-1})$ | $D_{\text{delithiation}} (\text{cm}^2 \cdot \text{s}^{-1})$ |
|--------|-----------------------------------------------------------|-------------------------------------------------------------|
| 1stTNO | $6.581 \times 10^{-17}$                                   | $9.206 \times 10^{-17}$                                     |
| 2ndTNO | $1.240 \times 10^{-16}$                                   | $1.348 \times 10^{-16}$                                     |
